# Supplementary material for: Tailoring hole injection of sol–gel processed WOx and its doping in PEDOT:PSS for efficient ultraviolet organic light-emitting diodes
Source: Royal Society of Chemistry journal article supplement (doi:10.1039/d0cp02006k), 2020-01-01
Supplement: d0cp02006k1.pdf [file d0cp02006k1.pdf]

## Supporting Information

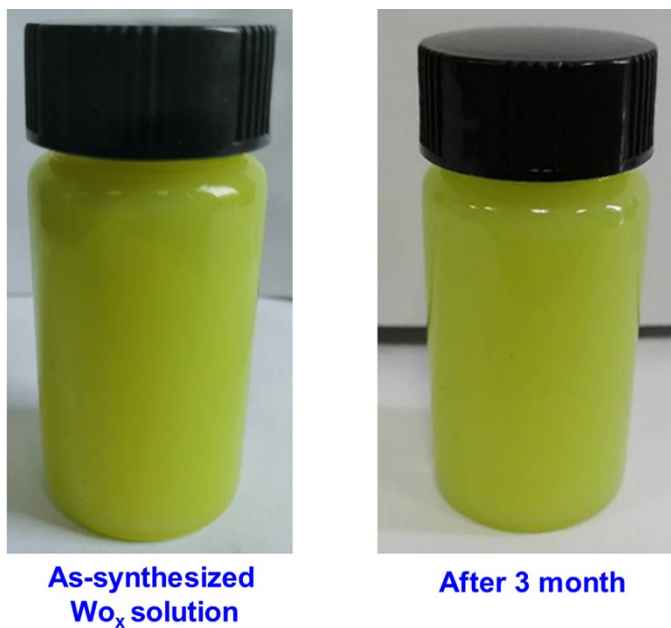

**Fig. S1** The as-synthesized  $WO_x$  sol-gel solution and placed in ambient conditions for 3 month.

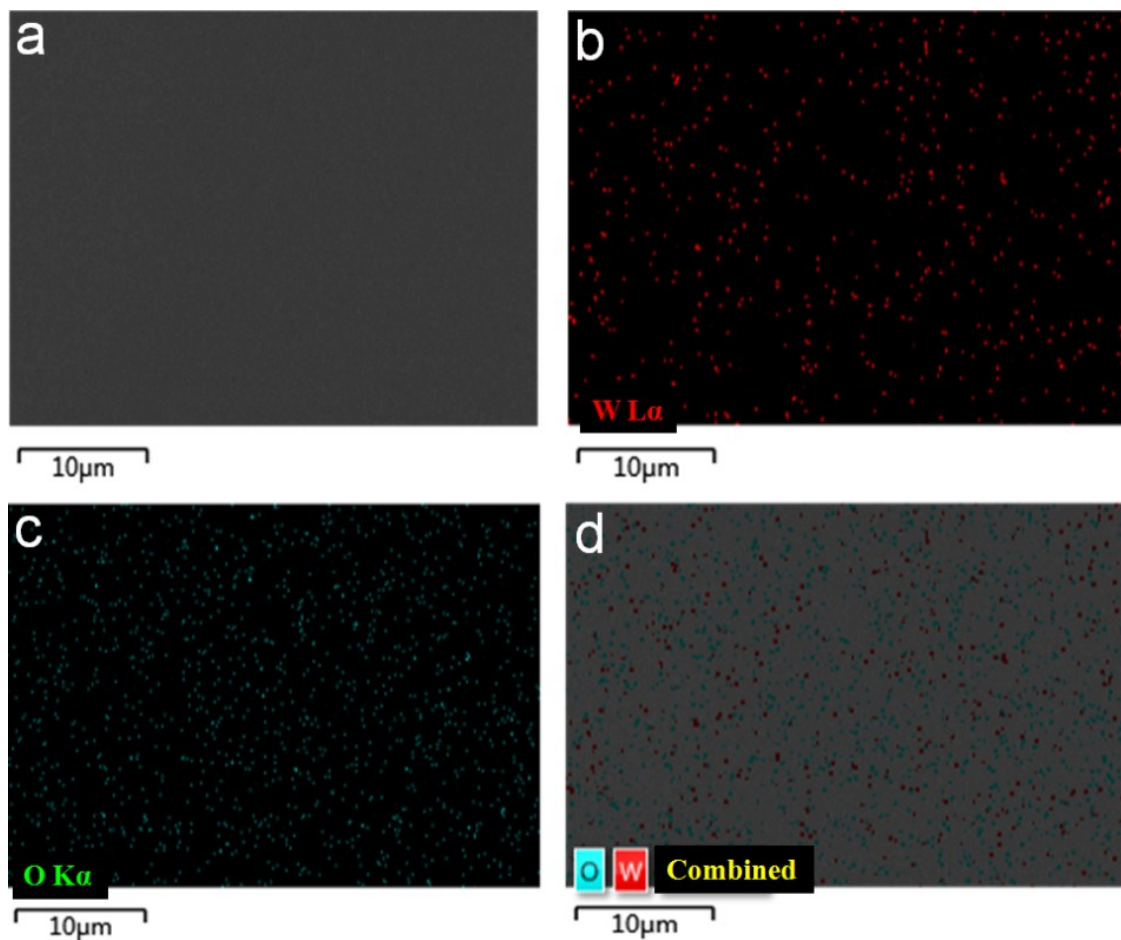

**Fig. S2** The SEM images of (a) surface morphology, (b) the W element mapping, (c) the O element mapping, and (d) the mapping of combined W and O elements.

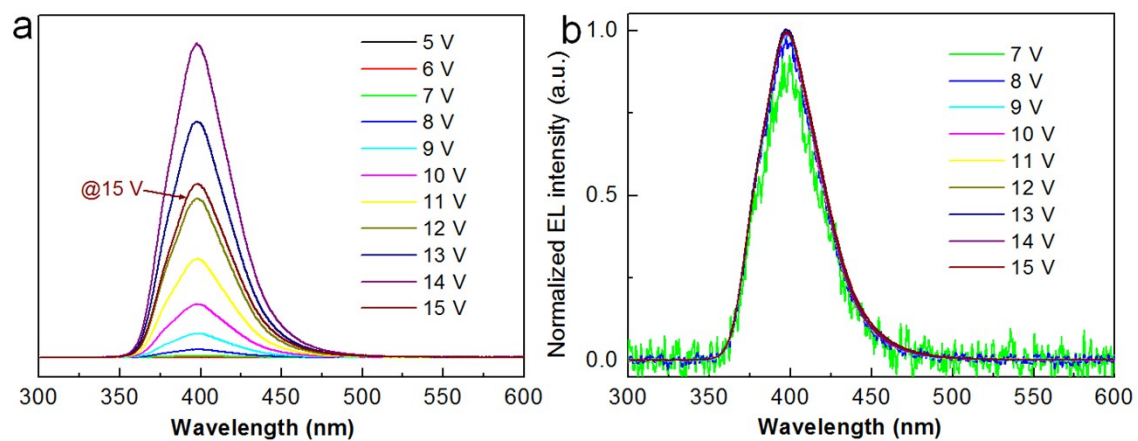

**Fig.S3** The (a) EL spectra and (b) normalized EL spectra of the UV OLED with HIL of PEDOT:PSS+WO<sub>x</sub>=20:1 (Device D) at different voltages.
